# Supplementary material for: On the mechanistic nature of epistasis in a canonical cis-regulatory element
Source: eLife. 2017 May 18;6:e25192. doi: 10.7554/eLife.25192 (PMC5481185; doi:10.7554/eLife.25192)
Supplement: Figure 3—source data 1. — Multiplicative epistasis, both in the absence and in the presence of the repressor CI, for each double mutant from the random mutant library is provided along with the standard deviation for the measurement, the t-test value (5 degrees of freedom), and the FDR-corrected p value. Double mutants that do not exhibit a significant epistatic interaction are marked in green. Wildtype normalized fluorescence measurement of each single and double mutant, from which the epistasis values were calculated, is also provided for both environments. DOI: http://dx.doi.org/10.7554/eLife.25192.006 [file elife-25192-fig3-data1.xlsx]

## Sheet: Sheet1
epistasis in the random mutant library			(green highlights indicate mutants that do not exhibit significant epistasis in the given environment)
	double mutant identity	multiplicative epistasis in absence of CI	st.dev. for epistasis in absence of CI	T value for epistasis in absence of CI	FDR corrected P value for epistasis in absence of CI	multiplicative epistasis in presence of CI	st.dev. for epistasis in presence of CI	T value for epistasis in absence of CI	FDR corrected P value for epistasis in presence of CI
	1	0.212773	0.0277956	-69.3745	8.3962e-07	1.97662	0.452816	5.28296	0.00323705
	2	0.725942	0.141802	-4.73406	7.16694e-05	2.69894	0.368081	11.306	9.46292e-05
	3	2.60295	0.310951	12.6271	0.000509418	2.56895	0.408013	9.41915	0.000227603
	4	0.729591	0.124652	-5.31369	0.0477365	0.209993	0.164833	-11.7399	7.88502e-05
	5	0.807805	0.292273	-1.61075	0.00107159	1.87312	0.649124	3.29475	0.0216002
	6	0.0751877	0.0181023	-125.14	0.0152354	0.814802	0.155886	-2.91008	0.0333965
	7	0.635586	0.117755	-7.58036	0.0193195	1.77465	0.488573	3.88376	0.0115977
	8	0.788296	0.139357	-3.72115	0.000607568	5.48808	5.53338	1.98676	0.103678
	9	2.66744	0.258061	15.8272	0.16367	2.72738	0.380243	11.1276	0.000102195
	10	1.24185	0.382204	1.54998	5.09744e-05	2.55554	0.907151	4.20026	0.00848743
	11	0.269732	0.301393	-5.93506	0.104049	1.26098	0.522112	1.22439	0.275341
	12	0.772618	0.111965	-4.97452	0.00712095	2.35923	1.3771	2.41772	0.0602871
	13	9.35394	1.23712	16.5407	7.6034e-09	7.31494	0.803423	19.2531	6.97152e-06
	14	0.731239	0.177267	-3.71377	0.00834661	2.82061	1.06899	4.17177	0.00872411
	15	0.16586	0.0853391	-23.9423	0.00774933	3.60381	0.907726	7.02637	0.000901016
	16	0.870358	0.111626	-2.84482	0.0458715	1.53118	0.690224	1.88508	0.118104
	17	0.740055	0.150811	-4.22205	0.402568	1.44665	0.564252	1.93897	0.110217
	18	0.273553	0.17469	-10.1862	0.00333487	12.3705	3.26666	8.5261	0.000365243
	19	0.595769	0.0924566	-10.7095	0.0022075	0.540202	0.201238	-5.59672	0.00251469
	20	1.01472	0.113323	0.318086	0.768767	0.867786	0.389592	-0.831273	0.443692
	21	0.891417	0.0592803	-4.48669	0.010822	1.68749	0.565708	2.97681	0.0309132
	22	0.749524	0.219462	-2.79565	0.0159358	4.40464	1.34349	6.20742	0.00158484
	23	1.11349	0.291446	0.953858	0.500221	2.0275	0.530708	4.74243	0.00513896
	24	0.571115	0.257735	-4.07609	0.000932451	0.893828	0.910583	-0.285606	0.786634
	25	0.772251	0.147825	-3.77384	3.13095e-05	3.71007	0.911808	7.28036	0.000764762
	26	0.0383282	0.0159681	-147.519	0.1208	1.111	0.369654	0.735508	0.495062
	27	0.383985	0.154418	-9.77168	0.00377382	1.37498	0.385257	2.38412	0.0628435
	28	0.71533	0.157212	1.27946	0.401794	0.603887	0.141081	-6.87741	0.000994284
	29	0.721188	0.138627	-4.9265	0.0022075	3.04681	0.837937	5.98331	0.00186929
	30	0.951686	0.0683236	-1.73213	0	1.10954	0.481986	0.556667	0.60175
	31	0.681611	0.230046	-3.39015	0.0259441	0.864722	0.427484	-0.775144	0.473301
	32	1.07225	0.186101	0.950915	0	2.73894	0.888233	4.7955	0.00490307
	33	0.7299	0.120538	-5.48878	0.00103766	2.37838	0.456592	7.39464	0.000711501
	34	0.737918	0.101814	-6.3053	0.00323049	7.41126	2.98489	5.26128	0.00329539
	35	0.966885	0.0983428	-0.824819	0.00377382	0.388536	0.312562	-4.79192	0.00491857
	36	0.71725	0.0833903	-8.30544	0.000219686	0.518314	0.209328	-5.63654	0.00243726
	37	0.601512	0.172613	-5.65481	0.00451335	0.493938	0.339552	-3.65068	0.0147378
	38	1.11368	0.119864	2.32313	0.0818137	0.854019	0.256972	-1.39151	0.222806
	39	0.68092	0.0838837	-9.31746	0.000465407	0.791696	0.240955	-2.11758	0.0877748
	40	0.406486	0.0566145	-25.679	1.30088e-05	0.319259	0.127919	-13.0354	4.73898e-05
	41	1.3074	0.198869	3.78628	0.0382781	2.83262	0.842016	5.33124	0.00311145
	42	0.614835	0.0995269	-9.47943	0.0121085	0.526248	0.497631	-2.33195	0.0670483
	43	0.612128	0.218981	-4.33869	0.00327364	2.80978	0.57965	7.64778	0.000608398
	44	0.133394	0.0226372	-93.7723	5.59424e-05	0.226699	0.494006	-3.83435	0.0121936
	45	0.36815	0.178844	-8.65398	0.0220088	2.29941	0.450675	7.06251	0.000879973
	46	0.730036	0.149701	-4.41732	0.00932451	3.26102	0.70474	7.85871	0.000535806
	47	0.768359	0.0905633	-6.26526	0.542945	0.697821	0.250321	-2.95694	0.0316305
	48	1.79071	0.344741	5.61827	0.00455451	1.09478	0.341418	0.679991	0.526712
	49	0.666519	0.16937	-4.82292	0.175314	2.92175	1.46276	3.2181	0.0235154
	50	0.652552	0.236489	-3.59877	4.54257e-07	1.23821	0.310225	1.88084	0.118748
	51	0.669502	0.0739903	-10.9413	0.468333	0.309669	0.665025	-2.5427	0.0517237
	52	0.918129	0.119903	-1.67254	5.99463e-06	1.45288	0.374528	2.96193	0.0314489
	53	1.05597	0.169345	0.809609	0.0590188	5.38682	0.711294	15.1069	2.30274e-05
	54	1.13242	0.152646	2.12498	0.104049	1.43552	1.68276	0.633956	0.553974
	55	2.10573	0.0892252	30.3555	0.293869	1.44897	0.271745	4.04695	0.00985494
	56	0.887253	0.130718	-2.11274	0.10478	4.65509	4.4671	2.00423	0.10139
	57	0.84311	0.0956203	-4.01902	0.200424	0.801965	0.265503	-1.82704	0.127251
	58	0.886314	0.104275	-2.67056	0.0549079	1.52493	0.464265	2.76955	0.0393862
	59	0.304547	0.0789604	-21.5742	2.77835e-05	1.05782	0.2372	0.597087	0.576457
	60	1.20468	0.252217	1.98778	0.0179363	0.620482	0.339621	-2.73724	0.040926
	61	1.19913	0.317151	1.53793	0.025579	2.00179	0.56813	4.31921	0.00757626
	62	0.910011	0.107374	-2.05289	0.00498093	1.58556	0.414928	3.4568	0.0181046
	63	0.860094	0.100439	-3.41203	0.0590188	0.862714	0.165243	-2.03506	0.0974799
	64	3.966	0.567573	12.8005	0.188246	3.19709	0.516419	10.4213	0.000140209
	65	0.708863	0.208101	-3.42688	0.0290997	1.75218	2.05396	0.890394	0.45081
	66	1.87074	0.431732	4.94026	0.00857211	0.380925	0.21683	-6.99358	0.000920624
	67	0.61817	0.273113	-3.42455	0.000245447	3.6277	0.383538	16.782	1.37312e-05
	68	0.68349	0.238212	-3.25461	2.66663e-07	1.57879	0.229863	6.16772	0.00163129
	69	0.0753721	0.0111545	-203.046	1.92437e-09	1.16113	0.416525	0.947573	0.386859
	70	2.52672	0.58577	6.38422	0.00584871	0.366826	0.212394	-7.30225	0.000754205
	71	2.51449	0.597521	6.20852	0.0473456	0.779936	0.398234	-1.35359	0.233838
	72	0.735819	0.109065	-5.93324	0.00303991	0.652989	0.385043	-2.20755	0.078346
	73	0.901698	0.0927517	-2.59606	0.463581	1.12926	0.274602	1.153	0.301033
	74	0.523527	0.167264	-6.9777	0.00257593	3.07649	1.07105	4.74893	0.00510939
	75	0.784972	0.158694	-3.31902	0.000932451	2.9154	0.591037	7.93819	0.000511153
	76	0.642039	0.104439	-8.39558	0.0204037	1.06663	0.35227	0.463289	0.662624
	77	0.858797	0.132933	-2.60186	5.59424e-05	1.30047	0.342612	2.14822	0.084435
	78	0.791208	0.760931	-0.672118	4.61431e-06	1.96113	0.46506	5.06234	0.00389228
	79	0.910595	0.178708	-1.22545	1.83327e-07	1.31976	0.360058	2.17535	0.0815903
	80	0.243613	0.0339267	-54.6107	0.00374619	1.10081	0.287708	0.858252	0.429965
	81	1.05089	0.197156	0.632246	0.563048	0.338959	0.730881	-2.21543	0.0775731
	82	1.15675	0.117055	3.28019	0.0436875	1.4373	3.0923	0.346397	0.743145
	83	0.919463	0.123392	-1.59877	0.00451335	0.59015	0.300478	-3.34109	0.020528
	84	0.284532	0.0541141	-32.3859	0.0202977	0.689746	0.23725	-3.20322	0.0239091
	85	0.647966	0.099727	-8.64665	1.26607e-09	0.228128	0.496183	-3.81048	0.0124939
	86	7.14212	0.817997	18.3926	5.09744e-05	0.342848	0.737398	-2.18293	0.0808137
	87	0.135172	0.0342636	-61.8261	0.027517	0.72484	0.2851	-2.36409	0.0644236
	88	0.745732	0.193367	-3.22095	0.0353141	0.0871066	0.087654	-25.5108	1.72806e-06
	89	0.421556	0.0797851	-17.7589	0.3596	0.830528	0.218601	-1.89898	0.116014
	90	0.0216672	0.00944904	-253.615	1.26607e-09	1.16605	0.326963	1.24395	0.268653
	91	0.444222	0.201183	-6.76684	0.186833	9.38398	3.46895	5.92008	0.00196015
	92	0.64378	0.0960703	-9.08249	0.000789498	0.704679	0.245201	-2.95018	0.0318789
	93	0.0243632	0.0113221	-211.074	1.92437e-09	0.420937	0.410779	-3.45297	0.0181793
	94	0.805912	0.129163	-3.68074	0.0254796	1.84023	0.501315	4.10545	0.00930509
	95	0.84854	0.0539526	-6.87641	0.0290997	0.773287	0.270553	-2.05257	0.09533
	96	0.603213	0.0588402	-16.5181	7.16694e-05	2.60082	0.816648	4.80158	0.00487687
	97	0.360004	0.133881	-11.7093	0.0265938	3.5342	0.466952	13.2937	4.30629e-05
	98	1.26601	0.193994	3.35875	3.89292e-06	4.16694	1.37416	5.64517	0.00242087
	99	0.164021	0.0078161	-261.988	0.0166263	2.13094	0.563167	4.919	0.0044013
	100	3.81558	0.557901	12.3619	0.00918991	0.682682	0.425227	-1.82789	0.127113
	101	0.46236	0.0403156	-32.6658	0.00834661	1.27264	0.434597	1.53668	0.184976
	102	0.36432	0.0452368	-34.4209	0.00333487	0.408422	0.177541	-8.16187	0.000448667
	103	0.78677	0.0782597	-6.674	0.186452	0.606651	0.243283	-3.96042	0.0107383
	104	0.741787	0.105757	-5.98059	0.129734	0.517837	0.144793	-8.15684	0.000449968
	105	0.841374	0.0847261	-4.586	0.198885	2.78162	0.643018	6.78684	0.00105658
	106	0.697918	0.0709415	-10.4304	0.000932451	0.641824	0.419549	-2.09117	0.0907646
	107	0.73764	0.104249	-6.16452	0.00336639	1.10889	0.371285	0.718388	0.504677
	108	0.849598	0.099688	-3.69561	0.000784703	1.34499	0.344486	2.45308	0.0577177
	109	0.758219	0.210745	-2.81022	0.905531	0.439025	0.148052	-9.28122	0.000244187
	110	0.678641	0.139402	-5.64675	0.00161388	1.17757	0.545775	0.796954	0.461627
	111	0.747101	0.128715	-4.81275	0.000831783	0.147654	0.101316	-20.6069	4.98132e-06
	112	0.749933	0.0684828	-8.94439	0.0249154	0.977779	0.234623	-0.231987	0.825744
	113	0.736954	0.1625	-3.96509	0.320149	1.09302	0.266163	0.856033	0.431082
	114	1.06788	0.144486	1.15081	0.00396127	1.51825	0.495992	2.55943	0.0506818
	115	0.91817	0.123842	-1.61852	0.0182896	1.292	0.476092	1.50236	0.193317
	116	1.06276	0.146363	1.05042	1.74486e-05	0.418044	0.352103	-4.04852	0.00983975
	117	0.460202	0.144752	-9.13448	0.0109287	1.52866	0.655541	1.97538	0.105198
	118	0.56033	0.559301	-1.92556	0.000330316	1.40385	0.513326	1.92708	0.111909
	119	1.28351	0.180886	3.83921	6.43813e-05	0.517741	0.212503	-5.55892	0.00259087
	120	2.60388	0.343634	11.4328	0.0022075	4.2702	0.944528	8.48078	0.000374553
	121	0.839177	0.0883095	-4.46084	0.0222918	1.26051	0.492424	1.29585	0.251619
	122	0.562258	0.0626006	-17.1283	1.44215e-08	0.766165	0.24549	-2.3332	0.0669441
	123	0.156986	0.0308132	-67.0152	0.00369086	0.0861758	0.0506076	-44.2306	1.11511e-07
	124	0.93445	0.0642089	-2.50065	0.0984113	0.830521	0.33204	-1.25027	0.266527
	125	0.757212	0.127156	-4.67698	8.54849e-05	2.00783	0.795654	3.10268	0.0267718
	126	0.84099	0.108883	-3.57715	0.112107	3.92433	1.18728	6.03321	0.00180107
	127	0.564038	0.166523	-6.41285	0.0201262	2.89927	0.539481	8.62353	0.000346145
	128	0.788531	0.0885312	-5.85094	0.00985849	5.50077	1.17926	9.34874	0.000235895
	129	0.480913	0.39104	-3.25158	0.0182896	2.74738	0.566152	7.56015	0.000641951
	130	0.513607	0.197915	-6.01983	0.000360478	1.03573	0.352097	0.248551	0.813594
	131	0.869102	0.0928206	-3.45434	0.155718	4.64341	0.721108	12.3761	6.10209e-05
	132	2.53993	0.242752	15.5387	0.000388077	1.91145	0.344979	6.47163	0.00131247
	133	0.742303	0.101847	-6.19777	0.0133747	0.732561	0.335583	-1.95209	0.10838
	134	1.25143	0.0881658	6.98548	0.000302144	3.20049	0.844071	6.38581	0.0013944
	135	0.688142	0.258693	-2.95289	0.0460479	1.12563	0.363059	0.847573	0.435359
	136	1.88711	1.22274	1.77712	0.000227867	3.12912	0.77636	6.71759	0.00110734
	137	0.508876	0.0929777	7.2869	0.00883942	0.596593	0.350936	-2.81573	0.0372956
	138	0.828225	0.119626	-3.51728	0.0235203	2.11572	0.493465	5.53826	0.00263365
	139	0.757402	0.154835	-3.83791	0.00566539	7.27437	1.05615	14.5519	2.7668e-05
	140	0.995774	0.0829311	-0.124817	9.0557e-05	3.73312	0.681462	9.82411	0.000186121
	141	0.861017	0.110703	-3.07522	0.0412395	3.35318	0.548906	10.5011	0.000135158
fluorescence measurements for random single and double mutants, from which epistasis was calculated						(all reported measurements are wildtype-normalized means)
	fluorescence measurements in the absence of CI									fluorescence measurements in the presence of CI
		double mutant identity	double mutant mean	double mutant standard deviation	single mutant 1 mean	single mutant 1 standard deviation	single mutant 2 mean	single mutant 2 standard deviation			double mutant identity	double mutant mean	double mutant standard deviation	single mutant 1 mean	single mutant 1 standard deviation	single mutant 2 mean	single mutant 2 standard deviation
		1	0.0228987	0.00243514	0.867656	0.0874225	0.124036	0.0135042			1	0.957369	0.135314	0.936885	0.294158	0.516977	0.161079
		2	0.478959	0.0862798	0.855019	0.0878339	0.771649	0.0104917			2	1.25917	0.139128	0.536293	0.178774	0.86994	0.14104
		3	0.0310465	0.0028843	0.855019	0.0878339	0.0139499	0.00485287			3	0.965552	0.133508	0.536293	0.178774	0.700838	0.207414
		4	0.231213	0.0383158	0.653545	0.0610505	0.484905	0.0240974			4	0.90693	0.159182	3.36844	0.316533	1.28216	0.155976
		5	0.46052	0.162526	0.855019	0.0878339	0.666754	0.0401245			5	1.58782	0.33546	0.536293	0.178774	1.58065	0.269571
		6	0.0493477	0.0109877	0.7869	0.0732559	0.834066	0.0853403			6	0.462095	0.0934439	0.772539	0.145612	0.734106	0.183741
		7	0.0207298	0.00351095	0.855019	0.0878339	0.0381457	0.00940472			7	0.626638	0.205032	0.536293	0.178774	0.658418	0.272994
		8	0.409978	0.0678434	0.801373	0.0745362	0.648987	0.0266995			8	15.6853	1.61991	1.04827	0.428039	2.72647	0.489406
		9	0.729745	0.0426664	0.855019	0.0878339	0.319963	0.0542321			9	1.23556	0.133473	0.536293	0.178774	0.844728	0.155413
		10	0.116628	0.0352112	0.801373	0.0745362	0.117192	0.0172058			10	1.00824	0.201153	1.04827	0.428039	0.376364	0.203034
		11	0.0213931	0.0238917	0.639433	0.056616	0.124036	0.0135042			11	0.774132	0.344156	1.1875	0.305304	0.516977	0.161079
		12	0.483263	0.0576648	0.855019	0.0878339	0.731548	0.0457988			12	2.75637	0.219309	0.536293	0.178774	2.17854	0.370723
		13	0.3863	0.0444713	0.638119	0.102026	0.0647185	0.00835745			13	2.86675	0.129289	0.664026	0.153601	0.590193	0.179372
		14	0.329804	0.0776129	0.930122	0.0612947	0.484905	0.0240974			14	6.62706	0.366562	1.83247	0.26649	1.28216	0.155976
		15	0.0164758	0.00843431	0.847636	0.0609729	0.117192	0.0172058			15	0.77125	0.256166	0.568623	0.159154	0.376364	0.203034
		16	0.647089	0.0565318	0.891373	0.0745362	0.834077	0.0795495			16	1.00341	0.341901	1.04827	0.428039	0.625145	0.454815
		17	0.327405	0.062751	0.801373	0.0745362	0.552061	0.0634241			17	0.888981	0.252772	1.04827	0.428039	0.586215	0.215761
		18	0.111153	0.0704142	0.700408	0.109549	0.580134	0.0425803			18	5.53398	0.625986	0.625145	0.454815	0.7156	0.289909
		19	0.358709	0.0394679	0.668598	0.0828655	0.900534	0.104806			19	0.821618	0.117038	1.15629	0.410301	1.31536	0.124044
		20	0.433815	0.0390243	0.668598	0.0828655	0.639433	0.056616			20	1.19156	0.233874	1.15629	0.410301	1.1875	0.305304
		21	0.503798	0.0162123	0.847636	0.0609729	0.666754	0.0401245			21	1.5167	0.264976	0.568623	0.159154	1.58065	0.269571
		22	0.390929	0.108429	0.700408	0.109549	0.744665	0.0725088			22	2.15942	0.219132	0.625145	0.454815	0.784235	0.385106
		23	0.450443	0.116244	0.732766	0.0356904	0.552061	0.0634241			23	1.40633	0.208242	1.18324	0.262357	0.586215	0.215761
		24	0.247814	0.110905	0.668598	0.0828655	0.648987	0.0266995			24	2.81788	0.476536	1.15629	0.410301	2.72647	0.489406
		25	0.0803198	0.0140841	0.700408	0.109549	0.148495	0.017268			25	0.997948	0.108796	0.625145	0.454815	0.430274	0.372285
		26	0.0111709	0.0045002	1.07602	0.0986969	0.270864	0.00605794			26	0.609334	0.208322	0.763821	0.157928	0.718044	0.407327
		27	0.0165428	0.00659239	0.744665	0.0725088	0.0578542	0.00653264			27	0.729985	0.159359	0.784235	0.385106	0.676975	0.180951
		28	0.384975	0.0805938	0.7869	0.0732559	0.683922	0.0496217			28	0.498368	0.135546	0.772539	0.145612	1.06825	0.133532
		29	0.462131	0.0798823	0.744665	0.0725088	0.86051	0.0748993			29	2.17916	0.162644	0.784235	0.385106	0.912008	0.248748
		30	0.0649677	0.00451158	0.572391	0.0317842	0.119264	0.00721132			30	0.844751	0.22809	0.984117	0.517238	0.773643	0.251493
		31	0.326508	0.106738	0.700408	0.109549	0.683922	0.0496217			31	0.577473	0.354955	0.625145	0.454815	1.06825	0.133532
		32	0.511508	0.0843532	0.639433	0.056616	0.746041	0.053907			32	4.0495	0.345572	1.1875	0.305304	1.24504	0.208529
		33	1.05471	0.0443688	1.13308	0.0920174	1.27529	0.0948509			33	2.32324	0.373799	1.09554	0.139599	0.891631	0.169935
		34	0.314608	0.0410327	0.639433	0.056616	0.666754	0.0401245			34	13.9111	0.976332	1.1875	0.305304	1.58065	0.269571
		35	0.470556	0.0359528	0.653545	0.0610505	0.744665	0.0725088			35	1.02638	0.206268	3.36844	0.316533	0.784235	0.385106
		36	0.449551	0.0199074	1.07602	0.0986969	0.58249	0.0286226			36	0.51844	0.278426	0.763821	0.157928	1.30953	0.0987298
		37	0.0148989	0.00427504	0.177558	0.0224739	0.139499	0.00485287			37	0.950449	0.380923	2.74561	0.314259	0.700838	0.207414
		38	0.0973279	0.010161	0.732766	0.0356904	0.119264	0.00721132			38	0.781771	0.162552	1.18324	0.262357	0.773643	0.251493
		39	0.0288666	0.00347505	0.732766	0.0356904	0.0578542	0.00653264			39	0.634165	0.168003	1.18324	0.262357	0.676975	0.180951
		40	0.157269	0.0211823	0.732766	0.0356904	0.527996	0.045349			40	0.554611	0.167132	1.18324	0.262357	1.46816	0.24319
		41	1.20164	0.133862	0.732766	0.0356904	1.25429	0.0799			41	3.2692	0.435679	1.18324	0.262357	0.975397	0.249156
		42	0.0127258	0.00205982	0.166871	0.00855595	0.124036	0.0135042			42	0.167044	0.218903	0.614001	0.27448	0.516977	0.161079
		43	0.319794	0.110066	0.900534	0.104806	0.580134	0.0425803			43	2.64477	0.310168	1.31536	0.124044	0.7156	0.289909
		44	0.0257921	0.00375627	0.194079	0.0109654	0.996257	0.0874147			44	0.275988	0.146561	3.98905	0.752349	0.30519	0.443095
		45	0.0169566	0.00808041	0.900534	0.104806	0.0511464	0.00916286			45	0.858567	0.186314	1.31536	0.124044	0.283865	0.139977
		46	0.359913	0.0655471	0.660831	0.128976	0.746041	0.053907			46	2.95877	0.141282	0.728743	0.202853	1.24504	0.208529
		47	0.365338	0.0242644	0.900534	0.104806	0.527996	0.045349			47	1.34761	0.422103	1.31536	0.124044	1.46816	0.24319
		48	0.383483	0.0643291	0.900534	0.104806	0.237804	0.016029			48	1.05754	0.251329	1.31536	0.124044	0.734389	0.446501
		49	1.31012	0.0196666	1.07602	0.0986969	1.82675	0.126107			49	5.41838	0.108213	0.763821	0.157928	2.42793	0.284257
		50	0.226862	0.081751	0.580134	0.0425803	0.599265	0.0492793			50	0.910246	0.163847	0.7156	0.289909	1.0273	0.212362
		51	0.0677744	0.00207156	1.07602	0.0986969	0.0940794	0.0109654			51	0.943537	0.126025	0.763821	0.157928	3.98905	0.752349
		52	0.857177	0.0041036	1.07602	0.0986969	0.867656	0.0874225			52	1.0397	0.207273	0.763821	0.157928	0.936885	0.294158
		53	1.13199	0.0937262	1.07602	0.0986969	0.996257	0.0874147			53	1.25572	0.0458886	0.763821	0.157928	0.30519	0.443095
		54	0.795527	0.0513436	0.7869	0.0732559	0.892743	0.115769			54	3.07168	0.293522	0.772539	0.145612	2.76979	0.590109
		55	0.390869	0.0116222	0.580134	0.0425803	0.319963	0.0542321			55	0.875882	0.0815291	0.7156	0.289909	0.844728	0.155413
		56	0.619588	0.0623512	1.07602	0.0986969	0.648987	0.0266995			56	9.69438	0.962304	0.763821	0.157928	2.72647	0.489406
		57	0.396894	0.0351774	0.7869	0.0732559	0.598234	0.0685995			57	0.443776	0.181258	0.772539	0.145612	0.71629	0.262463
		58	0.451648	0.0363374	0.534036	0.0620272	0.954205	0.082992			58	0.767679	0.247158	0.905393	0.233705	0.556023	0.327922
		59	0.0105258	0.00270666	0.534036	0.0620272	0.0647185	0.00835745			59	0.565253	0.116628	0.905393	0.233705	0.590193	0.179372
		60	0.385532	0.0788828	0.534036	0.0620272	0.599265	0.0492793			60	0.577114	0.405968	0.905393	0.233705	1.0273	0.212362
		61	0.020115	0.00509132	0.700408	0.109549	0.0239499	0.00485287			61	0.877035	0.207366	0.625145	0.454815	0.700838	0.207414
		62	0.70662	0.0466825	0.847636	0.0609729	0.916073	0.0905875			62	0.848248	0.28343	0.568623	0.159154	0.940841	0.127499
		63	0.233466	0.023701	0.7869	0.0732559	0.344952	0.00816516			63	0.640792	0.126608	0.772539	0.145612	0.961457	0.147878
		64	0.897357	0.10257	0.660831	0.128976	0.34239	0.0358787			64	1.43437	0.194163	0.728743	0.202853	0.615648	0.170067
		65	0.497976	0.133787	0.7869	0.0732559	0.892743	0.115769			65	3.76012	0.997919	0.772539	0.145612	2.76979	0.590109
		66	0.407572	0.00562477	1.82675	0.126107	0.119264	0.00721132			66	0.71551	0.248778	2.42793	0.284257	0.773643	0.251493
		67	0.0108254	0.0047809	0.34239	0.0358787	0.0511464	0.00916286			67	0.63398	0.0613594	0.615648	0.170067	0.283865	0.139977
		68	0.160052	0.0554817	0.34239	0.0358787	0.683922	0.0496217			68	1.03832	0.105058	0.615648	0.170067	1.06825	0.133532
		69	0.0486989	0.00560197	0.744665	0.0725088	0.867656	0.0874225			69	0.853126	0.248808	0.784235	0.385106	0.936885	0.294158
		70	0.267037	0.00694447	1.82675	0.126107	0.0578542	0.00653264			70	0.602931	0.245479	2.42793	0.284257	0.676975	0.180951
		71	0.297275	0.0173327	1.82675	0.126107	0.0647185	0.00835745			71	1.11761	0.171221	2.42793	0.284257	0.590193	0.179372
		72	0.172232	0.0246877	0.319963	0.0542321	0.731548	0.0457988			72	1.20168	0.131583	0.844728	0.155413	2.17854	0.370723
		73	0.0645573	0.00636071	0.119472	0.00835745	0.599265	0.0492793			73	0.684672	0.163603	0.590193	0.179372	1.0273	0.212362
		74	0.0177071	0.00544311	0.0339499	0.00485287	0.996257	0.0874147			74	0.658027	0.292906	0.700838	0.207414	0.30519	0.443095
		75	0.0276173	0.00513706	0.954205	0.082992	0.036871	0.00855595			75	0.995315	0.136856	0.556023	0.327922	0.614001	0.27448
		76	0.0377034	0.00606172	0.580134	0.0425803	0.101226	0.0142627			76	0.531753	0.20572	0.7156	0.289909	0.69667	0.208393
		77	0.398301	0.0593109	0.580134	0.0425803	0.799451	0.0428893			77	1.09807	0.28171	0.7156	0.289909	1.17994	0.139724
		78	0.0175091	0.0168335	0.580134	0.0425803	0.0381457	0.00940472			78	0.924016	0.172552	0.7156	0.289909	0.658418	0.272994
		79	0.0476133	0.00913767	0.0874042	0.00738293	0.598234	0.0685995			79	0.843035	0.208306	0.891788	0.249451	0.71629	0.262463
		80	0.0431966	0.00583386	0.259264	0.00721132	0.683922	0.0496217			80	0.909758	0.25028	0.773643	0.251493	1.06825	0.133532
		81	0.0826729	0.0155085	0.194079	0.0109654	0.405347	0.00416658			81	0.862573	0.238577	3.98905	0.752349	0.637939	0.268811
		82	0.281591	0.00389929	0.194079	0.0109654	1.25429	0.0799			82	5.5924	0.449165	3.98905	0.752349	0.975397	0.249156
		83	0.10063	0.0106128	0.119472	0.00835745	0.916073	0.0905875			83	0.327697	0.227628	0.590193	0.179372	0.940841	0.127499
		84	0.0491858	0.009261	0.259264	0.00721132	0.666754	0.0401245			84	0.84346	0.0942243	0.773643	0.251493	1.58065	0.269571
		85	0.0969001	0.0144347	0.194079	0.0109654	0.770535	0.0501395			85	0.54072	0.270842	3.98905	0.752349	0.59419	0.20183
		86	0.672146	0.0765668	0.194079	0.0109654	0.484905	0.0240974			86	1.75352	0.247518	3.98905	0.752349	1.28216	0.155976
		87	0.0139877	0.00338312	0.867656	0.0874225	0.119264	0.00721132			87	0.525374	0.228656	0.936885	0.294158	0.773643	0.251493
		88	0.325854	0.0815118	0.653545	0.0610505	0.668598	0.0828655			88	0.339272	0.267746	3.36844	0.316533	1.15629	0.410301
		89	0.0290073	0.00546281	0.319963	0.0542321	0.215056	0.0338851			89	0.587304	0.163125	0.844728	0.155413	0.837128	0.243066
		90	0.0156802	0.00664074	0.867656	0.0874225	0.834066	0.0853403			90	0.801974	0.19638	0.936885	0.294158	0.734106	0.183741
		91	0.210212	0.0945008	0.639433	0.056616	0.740052	0.0557415			91	15.6972	0.708	1.1875	0.305304	1.40864	0.260221
		92	0.294928	0.0372383	0.867656	0.0874225	0.527996	0.045349			92	0.969285	0.178415	0.936885	0.294158	1.46816	0.24319
		93	0.0137189	0.00628548	0.867656	0.0874225	0.648987	0.0266995			93	1.07523	0.108077	0.936885	0.294158	2.72647	0.489406
		94	0.339072	0.047707	0.867656	0.0874225	0.484905	0.0240974			94	2.21054	0.37975	0.936885	0.294158	1.28216	0.155976
		95	0.339045	0.0167988	0.599265	0.0492793	0.666754	0.0401245			95	1.25566	0.130347	1.0273	0.212362	1.58065	0.269571
		96	0.0499905	0.00486328	0.348495	0.017268	0.237804	0.016029			96	0.821829	0.201411	0.430274	0.372285	0.734389	0.446501
		97	0.0105438	0.00384862	0.0351146	0.00916286	0.834066	0.0853403			97	0.736483	0.0885072	0.283865	0.139977	0.734106	0.183741
		98	0.0296408	0.00447219	0.0351146	0.00916286	0.666754	0.0401245			98	1.86967	0.323939	0.283865	0.139977	1.58065	0.269571
		99	0.0154827	0.000731451	0.348495	0.017268	0.270864	0.00605794			99	0.658365	0.105529	0.430274	0.372285	0.718044	0.407327
		100	0.100137	0.0146398	0.259264	0.00721132	0.101226	0.0142627			100	0.367948	0.308177	0.773643	0.251493	0.69667	0.208393
		101	0.0514431	0.00426862	0.166871	0.00855595	0.666754	0.0401245			101	1.23512	0.168481	0.614001	0.27448	1.58065	0.269571
		102	0.0449911	0.00526875	0.166871	0.00855595	0.740052	0.0557415			102	0.353246	0.16095	0.614001	0.27448	1.40864	0.260221
		103	0.169828	0.0138774	0.319963	0.0542321	0.674622	0.0800425			103	1.02882	0.186914	0.844728	0.155413	2.00763	0.256397
		104	0.228138	0.0318375	0.58249	0.0286226	0.527996	0.045349			104	0.995592	0.0946734	1.30953	0.0987298	1.46816	0.24319
		105	0.0804134	0.00747673	0.770535	0.0501395	0.124036	0.0135042			105	0.854466	0.246794	0.59419	0.20183	0.516977	0.161079
		106	0.0335657	0.00340879	0.177558	0.0224739	0.270864	0.00605794			106	1.26533	0.109464	2.74561	0.314259	0.718044	0.407327
		107	0.169294	0.0228718	0.310123	0.0142627	0.740052	0.0557415			107	1.08822	0.275922	0.69667	0.208393	1.40864	0.260221
		108	0.466404	0.0361548	0.916073	0.0905875	0.599265	0.0492793			108	1.29996	0.335465	0.940841	0.127499	1.0273	0.212362
		109	0.301716	0.0797652	0.683922	0.0496217	0.581831	0.135447			109	0.348828	0.133888	1.06825	0.133532	0.743786	0.315965
		110	0.312484	0.0592088	0.552061	0.0634241	0.834066	0.0853403			110	0.50676	0.315185	0.586215	0.215761	0.734106	0.183741
		111	0.630493	0.0861505	0.916073	0.0905875	0.921237	0.0697216			111	0.232072	0.176015	0.940841	0.127499	1.67056	0.345531
		112	0.102713	0.00389695	0.916073	0.0905875	0.149511	0.0242598			112	0.725562	0.198153	0.940841	0.127499	0.78871	0.195925
		113	0.0114005	0.00251349	0.103469	0.00416658	0.149511	0.0242598			113	0.54995	0.137969	0.637939	0.268811	0.78871	0.195925
		114	0.593868	0.0664607	0.834066	0.0853403	0.666754	0.0401245			114	1.76172	0.171042	0.734106	0.183741	1.58065	0.269571
		115	0.782335	0.0702169	0.916073	0.0905875	0.930122	0.0612947			115	2.22749	0.256695	0.940841	0.127499	1.83247	0.26649
		116	0.64603	0.0767775	0.653545	0.0610505	0.930122	0.0612947			116	2.5804	0.317546	3.36844	0.316533	1.83247	0.26649
		117	0.234049	0.0715988	0.552061	0.0634241	0.921237	0.0697216			117	1.49702	0.158789	0.586215	0.215761	1.67056	0.345531
		118	0.0461601	0.0460461	0.103469	0.00416658	0.796183	0.0447463			118	0.886498	0.261632	0.637939	0.268811	0.989872	0.385417
		119	0.406115	0.055112	0.599265	0.0492793	0.527996	0.045349			119	0.780877	0.307546	1.0273	0.212362	1.46816	0.24319
		120	0.162083	0.0206547	0.501843	0.068275	0.124036	0.0135042			120	0.958809	0.251742	0.434323	0.325798	0.516977	0.161079
		121	0.457782	0.0331534	0.834066	0.0853403	0.654041	0.0422245			121	0.599109	0.286184	0.734106	0.183741	0.647444	0.354721
		122	0.116229	0.0124729	0.599265	0.0492793	0.344952	0.00816516			122	0.756741	0.276408	1.0273	0.212362	0.961457	0.147878
		123	0.0715869	0.0137063	0.683922	0.0496217	0.666754	0.0401245			123	0.14551	0.100186	1.06825	0.133532	1.58065	0.269571
		124	0.328967	0.0192732	0.527996	0.045349	0.666754	0.0401245			124	1.92734	0.125554	1.46816	0.24319	1.58065	0.269571
		125	0.426068	0.0605811	0.834066	0.0853403	0.674622	0.0800425			125	2.95917	0.46436	0.734106	0.183741	2.00763	0.256397
		126	0.535461	0.0485093	0.855019	0.0878339	0.744665	0.0725088			126	1.65049	0.463902	0.536293	0.178774	0.784235	0.385106
		127	0.0142154	0.00419547	0.215056	0.0338851	0.117192	0.0172058			127	0.913457	0.131172	0.837128	0.243066	0.376364	0.203034
		128	0.394238	0.0244528	0.501843	0.068275	0.996257	0.0874147			128	0.729132	0.1659	0.434323	0.325798	0.30519	0.443095
		129	0.0545557	0.0441153	0.914591	0.0933066	0.124036	0.0135042			129	1.10867	0.228081	0.780568	0.236134	0.516977	0.161079
		130	0.00770386	0.0029686	0.259264	0.00721132	0.0578542	0.00653264			130	0.542449	0.226045	0.773643	0.251493	0.676975	0.180951
		131	0.129454	0.00798946	0.996257	0.0874147	0.149511	0.0242598			131	1.1177	0.0798529	0.30519	0.443095	0.78871	0.195925
		132	1.00412	0.0136907	0.660831	0.128976	0.598234	0.0685995			132	0.997757	0.0813449	0.728743	0.202853	0.71629	0.262463
		133	0.497233	0.0513355	0.727122	0.0874213	0.921237	0.0697216			133	1.32712	0.201099	1.08444	0.216564	1.67056	0.345531
		134	0.113005	0.00665368	0.770535	0.0501395	0.117192	0.0172058			134	0.715732	0.24388	0.59419	0.20183	0.376364	0.203034
		135	0.31066	0.11419	0.855019	0.0878339	0.527996	0.045349			135	0.886279	0.229802	0.536293	0.178774	1.46816	0.24319
		136	0.00843606	0.00546608	0.117192	0.0172058	0.0381457	0.00940472			136	0.775412	0.222728	0.376364	0.203034	0.658418	0.272994
		137	0.128414	0.0230622	0.731548	0.0457988	0.344952	0.00816516			137	1.24961	0.0944168	2.17854	0.370723	0.961457	0.147878
		138	0.688293	0.05735	0.865213	0.108076	0.96051	0.0748993			138	2.14818	0.344749	1.1133	0.154022	0.912008	0.248748
		139	0.42795	0.0727348	0.855019	0.0878339	0.660831	0.128976			139	2.84297	0.288123	0.536293	0.178774	0.728743	0.202853
		140	0.424447	0.00988232	0.855019	0.0878339	0.498524	0.0550811			140	2.52969	0.19538	0.536293	0.178774	1.26355	0.177241
		141	0.252063	0.0261223	0.855019	0.0878339	0.34239	0.0358787			141	1.10711	0.199179	0.536293	0.178774	0.615648	0.170067
