# Supplementary material for: On the mechanistic nature of epistasis in a canonical cis-regulatory element
Source: eLife. 2017 May 18;6:e25192. doi: 10.7554/eLife.25192 (PMC5481185; doi:10.7554/eLife.25192)
Supplement: Figure 6—source data 1. — Multiplicative epistasis, both in the absence and in the presence of the repressor CI, for each double mutant from the 30-mutant validation library, is provided along with the standard deviation for the measurement, the t-test value (5 degrees of freedom), and the FDR-corrected p value. Double mutants that do not exhibit a significant epistatic interaction are marked in green. Wildtype normalized fluorescence measurement of each single and double mutant, from which the epistasis values were calculated, is also provided for both environments. DOI: http://dx.doi.org/10.7554/eLife.25192.014 [file elife-25192-fig6-data1.xlsx]

## Sheet: Sheet1
measurements of epistasis in mutants for model verification			(green highlights indicate mutants that do not exhibit significant epistasis in the given environment)
	mutant	multiplicative epistasis in absence of CI	st.dev. for epistasis in absence of CI	FDR corrected P value for epistasis in absence of CI	multiplicative epistasis in presence of CI	st.dev. for epistasis in presence of CI	FDR corrected P value for epistasis in presence of CI
	mv1	1.64708	0.167687	0.0163775	2.25162	0.547473	0.0446527
	mv2	1.60987	0.168517	0.0185578	1.23293	1.39299	0.769872
	mv3	1.75077	0.112669	0.00558326	2.29753	0.468344	0.0310617
	mv4	1.20229	0.119541	0.0773131	1.39795	1.39785	0.626527
	mv5	1.1693	0.109644	0.0907994	11.9664	3.57987	0.0256213
	mv6	0.920024	0.147603	0.39177	0.0420646	0.193277	0.0100244
	mv7	0.908009	0.142225	0.325058	0.154967	0.494998	0.0761175
	mv8	0.989012	0.144879	0.893357	0.110315	0.278872	0.0236933
	mv9	0.871106	0.13578	0.198034	2.11855	1.81217	0.342387
	mv10	0.954857	0.124092	0.542523	0.1666	0.0701275	0.00176546
	mv11	0.0243632	0.0113221	1.92437e-09	0.420937	0.410779	0.0181793
	mv12	0.36432	0.0452368	0.00333487	0.408422	0.177541	0.000448667
	mv13	0.234489	0.0239814	0.000245259	2.2569	0.559273	0.0461019
	mv14	2.51449	0.597521	0.0573456	0.779936	0.398234	0.233838
	mv15	0.681611	0.230046	0.0259441	0.864722	0.427484	0.473301
	mv16	0.0180172	0.00179595	8.3622e-07	1.64864	0.173749	0.0174693
	mv17	0.898526	0.0974101	0.172609	1.43723	0.180742	0.0401647
	mv18	0.947623	0.157472	0.574354	2.8499	0.323031	0.00753701
	mv19	0.969073	0.0751077	0.49678	2.1993	3.28898	0.541672
	mv20	0.115531	0.00873241	2.43684e-05	0.834744	0.627727	0.65109
	mv21	0.0914283	0.00603196	1.10187e-05	2.18032	3.21909	0.539667
	mv22	0.236615	0.0187589	0.000150928	1.19832	0.162616	0.134892
	mv23	0.303825	0.0144058	0.000107031	3.17831	0.248694	0.00324276
	mv24	0.409505	0.0234939	0.000395513	6.37933	0.394143	0.00133942
	mv25	0.617964	0.0742907	0.00932171	2.77716	2.87461	0.341793
	mv26	0.311382	0.0284003	0.000424965	1.0998	0.20363	0.430346
	mv27	2.88548	0.418355	0.0120852	0.195036	0.286752	0.0302907
	mv28	0.992756	0.130081	0.921487	2.20047	2.1695	0.383726
	mv29	0.6545	0.0783449	0.0126121	8.80666	3.44667	0.0454359
	mv30	0.994299	0.149702	0.946221	4.90532	1.41017	0.0310846
fluorescence measurements for single and double mutants designed to test the model, from which epistasis was calculated					(all reported measurements are wildtype-normalized means)
	fluorescence measurements in the absence of CI								fluorescence measurements in the presence of CI
	mutant	double mutant mean	double mutant standard deviation	single mutant 1 mean	single mutant 1 standard deviation	single mutant 2 mean	single mutant 2 standard deviation		mutant	double mutant mean	double mutant standard deviation	single mutant 1 mean	single mutant 1 standard deviation	single mutant 2 mean	single mutant 2 standard deviation
	mv1	0.0165565	0.000858696	0.0101044	0.00123593	0.994819	0.0880634		mv1	3.1541	0.174926	0.868	0.08399	1.61384	0.139562
	mv2	0.110537	0.00622927	0.0591575	0.00125082	1.16066	0.076002		mv2	7.78854	0.640345	4.33165	0.255127	1.45836	0.150929
	mv3	0.0495401	0.0010622	0.0285405	0.00288879	0.991443	0.0612007		mv3	4.19438	0.291123	1.64191	0.108619	1.11188	0.0631504
	mv4	0.0172484	0.0005857	0.0133891	0.00124585	1.07149	0.0872147		mv4	5.91762	0.0688339	1.28338	0.112408	3.29839	0.299964
	mv5	0.862211	0.0013352	0.671588	0.062521	1.09795	0.0763495		mv5	11.7574	0.957359	1.53998	0.185662	0.638014	0.0524148
	mv6	0.998934	0.0996484	1.04158	0.080365	1.04242	0.089895		mv6	1.62031	0.0978831	4.05156	0.375745	9.50732	0.455946
	mv7	1.08907	0.0883762	1.19825	0.0931263	1.00096	0.0740712		mv7	1.14208	0.103567	1.06293	0.0738859	6.93352	0.460366
	mv8	1.06724	0.100165	1.09149	0.0837948	0.988642	0.0662139		mv8	1.08987	0.0959885	8.19475	0.308174	1.2056	0.0593613
	mv9	1.11551	0.0955634	1.0993	0.0885449	1.1649	0.0742548		mv9	11.6719	0.983883	1.84399	0.171137	2.98776	0.2646
	mv10	1.046	0.0769699	1.04866	0.0646255	1.04462	0.079412		mv10	0.55031	0.0391532	1.52561	0.116828	2.16516	0.173032
	mv11	0.0137189	0.00628548	0.867656	0.0874225	0.648987	0.0266995		mv11	1.07523	0.108077	0.936885	0.294158	2.72647	0.489406
	mv12	0.0449911	0.00526875	0.166871	0.00855595	0.740052	0.0557415		mv12	0.353246	0.16095	0.614001	0.27448	1.40864	0.260221
	mv13	0.0108254	0.0047809	0.34239	0.0358787	0.0511464	0.00916286		mv13	0.63398	0.0613594	0.615648	0.170067	0.283865	0.139977
	mv14	0.297275	0.0173327	1.82675	0.126107	0.0647185	0.00835745		mv14	1.11761	0.171221	2.42793	0.284257	0.590193	0.179372
	mv15	0.326508	0.106738	0.700408	0.109549	0.683922	0.0496217		mv15	0.577473	0.354955	0.625145	0.454815	1.06825	0.133532
	mv16	0.0148907	0.000496356	0.941992	0.0705471	0.877366	0.0756794		mv16	1.15457	0.089042	0.877088	0.0757804	0.798453	0.0341012
	mv17	0.221154	0.0224452	0.411309	0.00116147	0.598407	0.0636825		mv17	0.993761	0.0896735	0.710442	0.0505203	0.973258	0.0820955
	mv18	0.0290833	0.00482458	0.333799	0.0292602	0.091944	0.0030377		mv18	1.01657	0.106724	0.680712	0.0593613	0.524014	0.0265232
	mv19	0.296554	0.0172384	0.747187	0.0670229	0.409561	0.0267585		mv19	17.3906	1.65391	4.82077	0.306279	1.64027	0.132616
	mv20	0.0100399	0.000541028	0.838206	0.0632208	0.103676	0.00969383		mv20	0.902148	0.0517833	3.69881	0.202713	0.292188	0.0132616
	mv21	0.0090625	0.000526137	0.578328	0.0540333	0.171393	0.0138235		mv21	11.3809	0.776749	1.35706	0.0675709	3.84643	0.382691
	mv22	0.0397085	0.00299303	0.328991	0.0223856	0.510101	0.0459625		mv22	0.914591	0.0707284	1.04471	0.100409	0.730563	0.0517833
	mv23	0.0174065	0.000630372	0.107671	0.000615481	0.532093	0.0575177		mv23	0.580301	0.0410477	0.745631	0.0442053	0.244869	0.0233656
	mv24	0.0161052	0.000560882	0.0585474	0.00100264	0.671735	0.0678717		mv24	1.04755	0.0612558	0.552566	0.0347327	0.297178	0.0183136
	mv25	0.0338722	0.00337522	0.0630256	0.000933149	0.869686	0.0773322		mv25	4.18607	0.263968	0.397131	0.0378902	3.79553	0.272178
	mv26	0.282783	0.0130144	0.85109	0.0551054	1.06705	0.0592798		mv26	1.10354	0.103567	1.36192	0.114934	0.736754	0.0423107
	mv27	0.0479811	0.00352909	0.0137699	0.00126074	1.2076	0.103465		mv27	0.917785	0.0631504	0.987178	0.089042	4.76683	0.307542
	mv28	0.985468	0.0923917	0.828205	0.0515565	1.19857	0.067554		mv28	8.53594	0.73065	1.14335	0.10483	3.39278	0.287334
	mv29	1.22247	0.0777889	1.73056	0.0493179	1.0793	0.0507077		mv29	15.112	0.824744	1.37853	0.0688339	1.24479	0.301859
	mv30	1.08402	0.105907	0.958256	0.0587189	1.13773	0.0877061		mv30	11.1411	0.385217	1.83136	0.13451	1.24018	0.116197
